# Supplementary material
Source: Springer Nature journal article supplement (https://www.springermedizin.de/resource/supplementary/13256_2013_2794_MOESM1_ESM.pdf/9650580)
Supplement: MOESM1 [file 9650580]

|                                      | Elective Surgery                                  |         |               |         | COPD                      | Tracheostomized Patient                       |                                           |               |
|--------------------------------------|---------------------------------------------------|---------|---------------|---------|---------------------------|-----------------------------------------------|-------------------------------------------|---------------|
|                                      | <b>Case 1</b>                                     |         | <b>Case 2</b> |         | <b>Case 3</b>             | <b>Case 4</b>                                 | <b>Case 5</b>                             | <b>Case 6</b> |
|                                      | Preop.                                            | Postop. | Preop.        | Postop. |                           | (Head trauma)                                 | (CVD)                                     | (CVD)         |
| <b>BMI</b> (kg/m <sup>2</sup> )      | 28,3                                              |         | 20,3          |         | 25,2                      | 19,5                                          | 27,7                                      | 20,8          |
| <b>AHI</b> /h                        | 17                                                | 21      | 22            | 38      | 18                        | 2                                             | 18                                        | 34            |
| <b>AI</b> /h                         | 3                                                 | 4       | 0             | 0       | 8                         | 2                                             | 6                                         | 3             |
| <b>HI</b> /h                         | 14                                                | 17      | 22            | 38      | 10                        | 0                                             | 12                                        | 31            |
| <b>ODI</b> /h                        | 3                                                 | 1       | 3             | 1       | 5                         | 0                                             | 3                                         | 7             |
| <b>SpO<sub>2</sub></b> (%)<br>(min.) | 79                                                | 84      | 86            | 81      | 72                        | 95                                            | 89                                        | 79            |
| <b>HR</b> /min<br>(max.)             | 124                                               | 131     | 108           | 101     | 102                       | 109                                           | 83                                        | 97            |
| <b>Decision</b>                      | Postoperative ICU admission<br>Postoperative NIMV |         |               |         | Discharge<br>on BIPAP use | Discharge<br>on<br>spontaneous<br>respiration | Discharge<br>on<br>home ventilator<br>use |               |

AHI; Apnea Hypopnea Index AI; Apnea Index HI; Hypopnea Index ODI; Oxygen Desaturation Index SpO<sub>2</sub>; Peripheral Oxygen Saturation HR; Heart Rate  
COPD; Chronic Obstructive Pulmonary Disease CVD; Cerebrovascular Disease NIMV; Non-Invasive Mechanical Ventilation BIPAP; Bilevel Positive Airway Pressure
